# Supplementary material for: SARS-CoV-2 infection of African green monkeys results in mild respiratory disease discernible by PET/CT imaging and shedding of infectious virus from both respiratory and gastrointestinal tracts
Source: PubMed Central journal article supplement (PMC7535860; doi:10.1371/journal.ppat.1008903), 2020-09-18
Supplement: ppat.1008903.s001.pdf [file ppat.1008903.s001.pdf]

**S1 Table. African green monkey cohort description**

| <b>Animal ID</b> | <b>Sex</b> | <b>Age (years)</b> | <b>Weight (kg)</b> | <b>Infection Route</b> | <b>Exposure dose (log<sub>10</sub> pfu)</b> | <b>Euthanasia dpi</b> | <b>Outcome</b>                                    |
|------------------|------------|--------------------|--------------------|------------------------|---------------------------------------------|-----------------------|---------------------------------------------------|
| A1               | M          | 3.7                | 5.3                | Aero                   | 4.2                                         | 35                    | mild disease                                      |
| A2               | M          | 3.6                | 6.3                | Aero                   | 4.0                                         | 35                    | mild disease                                      |
| A3               | M          | 3.6                | 4.9                | Aero                   | 4.2                                         | 28                    | mild disease; infection at telemetry implant site |
| A4               | M          | 3.5                | 4.4                | Aero                   | 3.7                                         | 28                    | mild disease                                      |
| M1               | M          | 3.3                | 4.2                | Multi-route mucosal    | 6.4                                         | 28                    | mild disease                                      |
| M2               | M          | 3.2                | 4.3                | Multi-route mucosal    | 6.4                                         | 28                    | mild disease                                      |
