# Supplementary material for: SARS-CoV-2 infection of African green monkeys results in mild respiratory disease discernible by PET/CT imaging and shedding of infectious virus from both respiratory and gastrointestinal tracts
Source: PubMed Central journal article supplement (PMC7535860; doi:10.1371/journal.ppat.1008903), 2020-09-18
Supplement: ppat.1008903.s002.pdf [file ppat.1008903.s002.pdf]

**S2 Table: Markers used for lymphoid and myeloid flow cytometry panels**

| <b>Lymphoid</b>   | <b>Myeloid</b>          |
|-------------------|-------------------------|
| CD14, CD16 (dump) | CD3, CD20, NKG2A (dump) |
| Live/dead         | Live/dead               |
| CD3               | CD14                    |
| CD4               | CD16                    |
| CD8               | CD11c                   |
| HLA-DR            | HLA-DR                  |
| NKG2A             | CD123                   |
| CD38              | CD38                    |
| CD27              | Ki-67                   |
| CD20              |                         |
| Ki-67             |                         |
